# Supplementary material for: GDNF drives rapid tubule morphogenesis in a novel 3D in vitro model for ADPKD
Source: PubMed Central journal article supplement (PMC7375472; doi:10.1242/jcs.249557), 2020-07-16
Supplement: joces-133-249557-s1.pdf [file joces-133-249557-s1.pdf]

Fig. S1: Tubuloid culture with *Pkd1fl/fl Pax8rtTA TetOCre +mTmG*

A

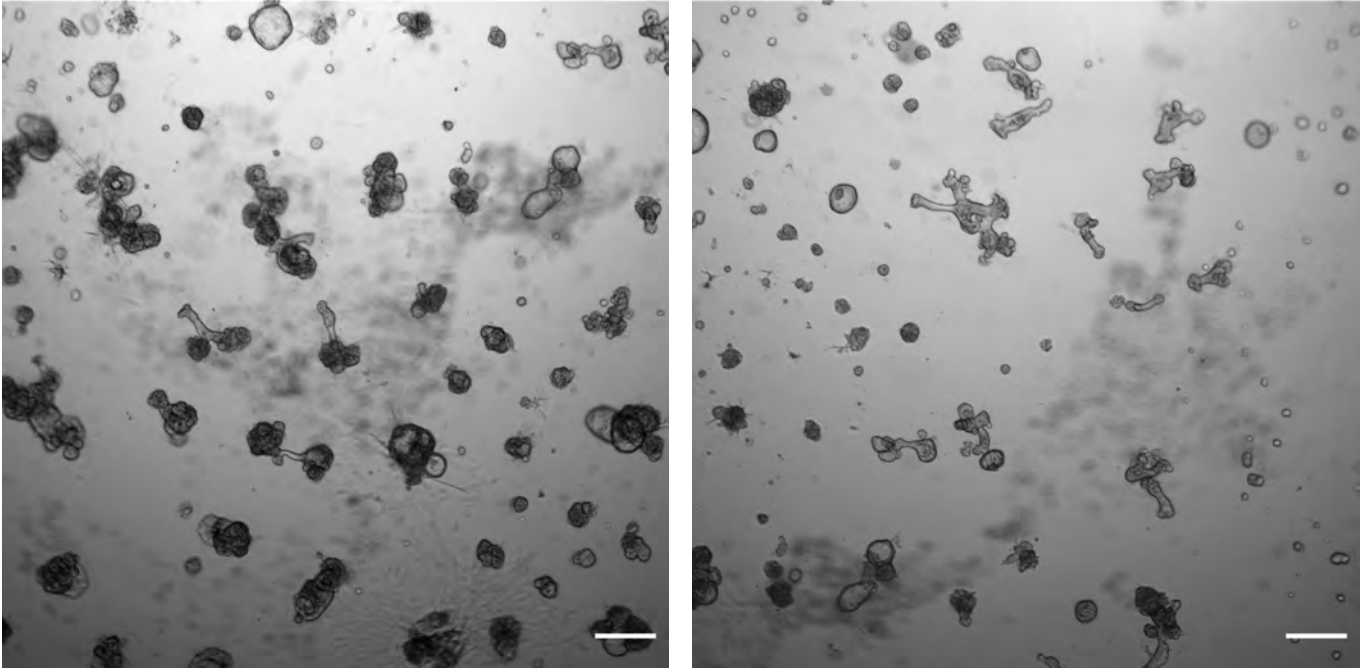

(A) Culture protocol can implement primary cells from mouse models with other genotypes. Brightfield images of tubuloids from *Pkd1fl/fl Pax8rtTA TetOCre +mTmG*. Magnification 4X, Scale Bar 250  $\mu$ m.

Fig. S2: Western blots and total loading controls for PC2

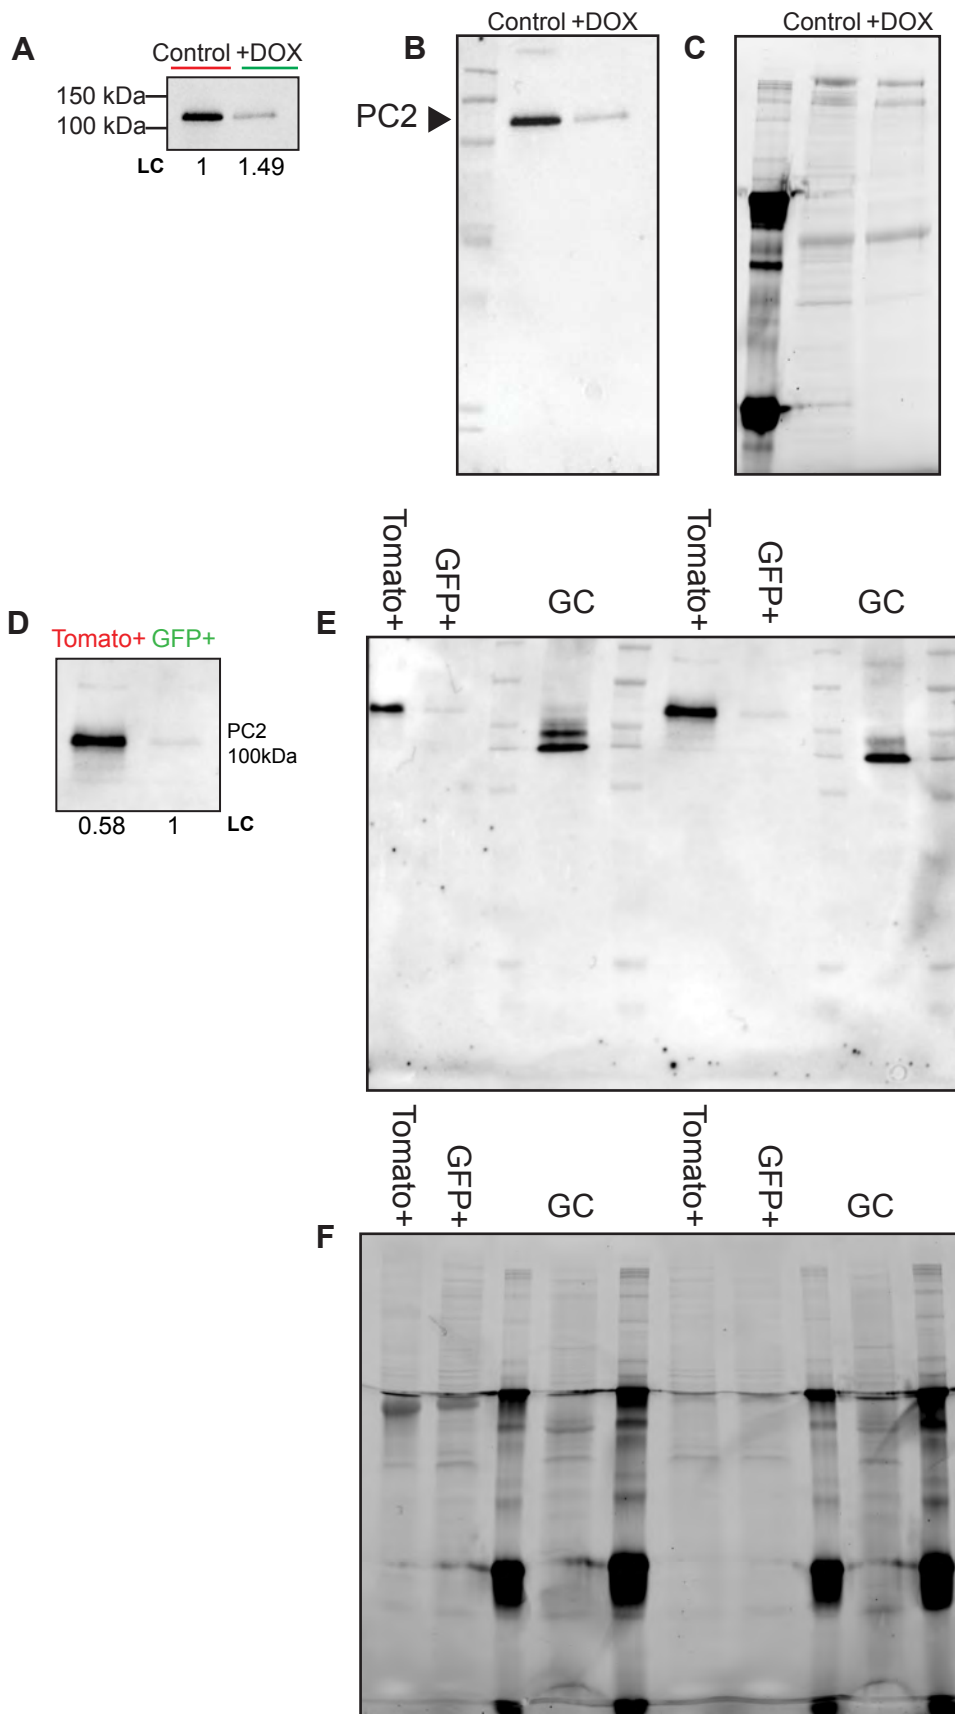

(A) Western blot for PC2 abundance, normalized to total loaded protein (LC) (n=3; two-tailed Student's t-test, p-value = 0.0420). (B) Uncropped representative western blot for PC2 in organoids as seen in Figure 4C. (C) Total loaded protein used for normalization of blot in (A). (D) Western blot to confirm significant decrease in PC2 abundance in green fluorescent cells (GFP+) when compared to controls (Tomato+), normalized to total loaded protein (LC) (two-tailed Student's t-test, p-value = 0.0336). (E) Uncropped representative western blot for PC2 in FACS cells as seen in Figure 4D, with gating control (GC). (F) Total loaded protein used for normalization of blot in (D).

Fig. S3: Expression of proliferation genes in *Pkd2*- tubuloids

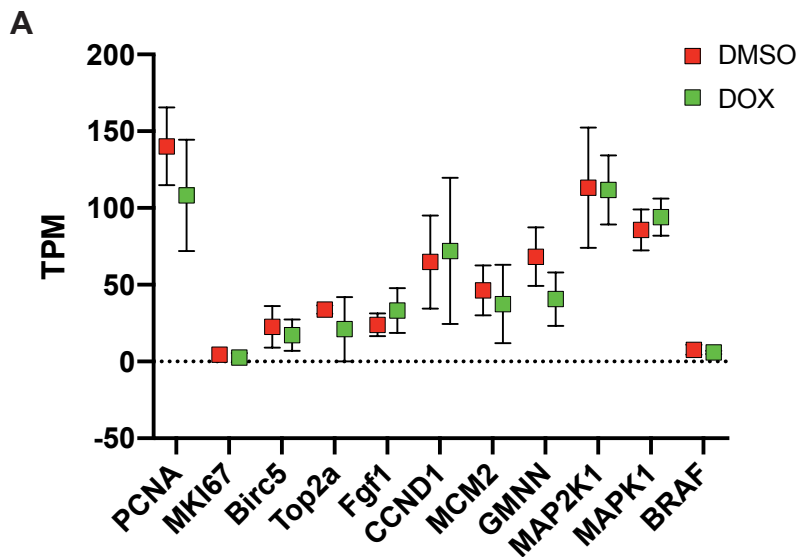

(A) A profile of ten proliferation genes reveals no significant change in expression between doxycycline treated (green square) and DMSO control (red square) tubuloids (n=4). Significance was defined in a two-tailed Student's t-test as a p-value of less than or equal to 0.05. Bars represent +/-SEM and those not seen are hidden behind boxes.

Fig. S4: Western blots and total loading controls for tensin-1

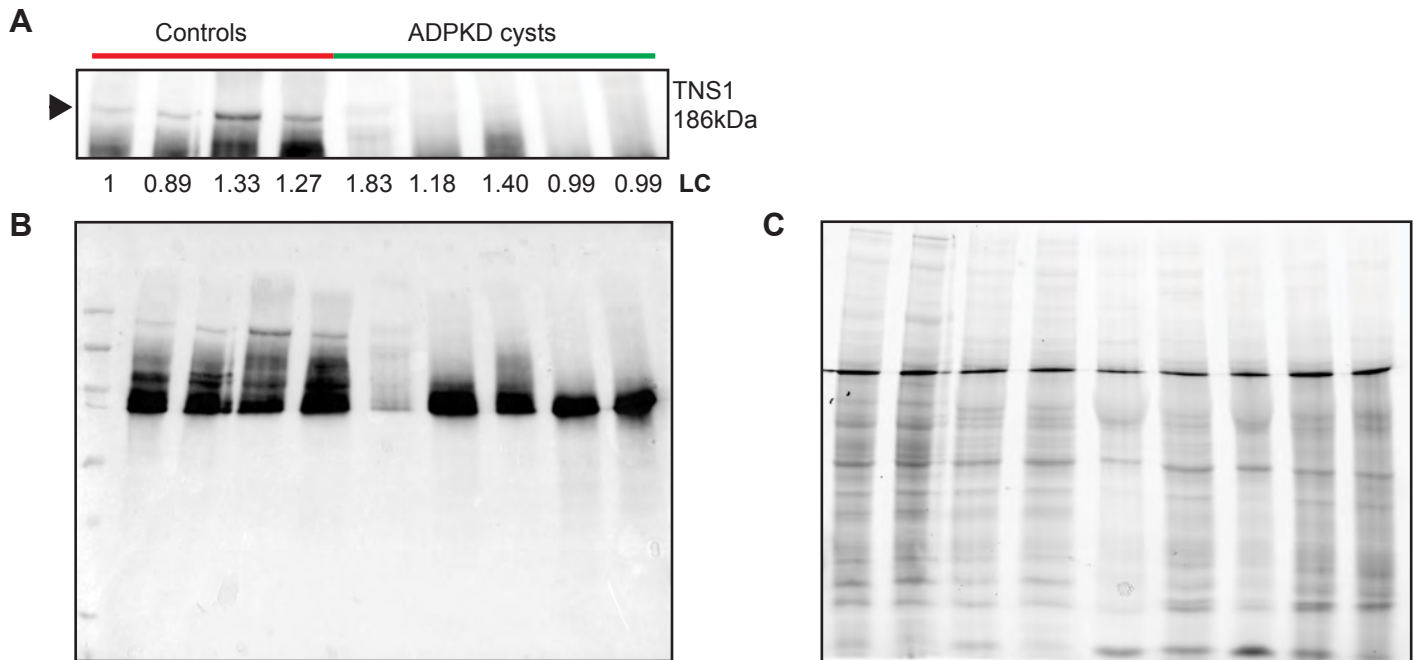

(A) Western blot exhibits significant decrease in tensin-1 (TNS1) in human male ADPKD cysts (n=5) compared to normal human male kidneys (n=4) and normalized to total loaded protein (LC) (two-tailed Student's t-test, p-value = 0.0340). (B) Uncropped western blot for TNS1 in human tissue as seen in Figure 6D. (C) Total loaded protein used for normalization of blot in (A).

**Table S1: GDNF pulse differentially expressed genes**

A list of genes with reported fold change, p-value, and adjusted p-value ( $\leq 0.05$ ) resulting from differential expression (DESeq) analysis of GDNF pulsed (n=4 cultures) and control (n=4 cultures) tubuloids.

[Click here to Download Table S1](#)

**Table S2: GDNF pulse differential pathway analysis**

A list of significantly altered gene ontology (GO) terms from pathway analysis of GDNF pulsed (n=4 cultures) and control (n=4 cultures), determined by nominal p-value ( $\leq 0.05$ ) along with reported values for size, es, nes, fdrQVal, fwerPVal, and rankAtMax. From significantly altered GO terms, non-neuro specific GO terms and MGI GO number with nominal p-value were included in REViGO representation.

[Click here to Download Table S2](#)

**Table S3: GDNF pulse PC TF analysis**

| GENE           | GDNF1    | GDNF2    | GDNF3    | GDNF4    | CTL1     | CTL2     | CTL3     | CTL4     | One-tailed Student's t-test |
|----------------|----------|----------|----------|----------|----------|----------|----------|----------|-----------------------------|
| <i>Gata3</i>   | 32.26604 | 15.72488 | 35.3853  | 40.9055  | 24.96285 | 9.642504 | 24.51733 | 13.17762 | 0.049949809                 |
| <i>Tfap2b</i>  | 3.052619 | 1.859329 | 4.514373 | 7.2772   | 2.650732 | 0.593037 | 3.272445 | 3.129981 | 0.115260295                 |
| <i>Ehf</i>     | 33.49256 | 13.52809 | 37.78405 | 40.72878 | 21.69552 | 5.139788 | 22.66092 | 17.01686 | 0.04549041                  |
| <i>Irf1</i>    | 41.69357 | 27.52123 | 43.46952 | 37.97642 | 31.63945 | 24.41116 | 29.73884 | 19.68488 | 0.022550114                 |
| <i>Irf9</i>    | 24.43075 | 14.76461 | 23.20745 | 22.94073 | 13.58074 | 14.81047 | 16.50369 | 10.28917 | 0.013168292                 |
| <i>Stat1</i>   | 10.12961 | 7.084977 | 6.76742  | 9.216172 | 7.086282 | 5.745113 | 5.906681 | 4.200367 | 0.021996706                 |
| <i>Tsc22d3</i> | 22.12605 | 18.84984 | 17.24039 | 13.46117 | 14.82216 | 29.72123 | 17.12784 | 17.69298 | 0.315742822                 |
| <i>Nfia</i>    | 9.771741 | 8.088848 | 6.936182 | 5.848866 | 4.677708 | 6.133078 | 4.613625 | 1.950422 | 0.016812074                 |
| <i>Maf</i>     | 9.315971 | 7.586065 | 9.245634 | 7.061692 | 5.883636 | 4.943121 | 7.791981 | 2.774088 | 0.023882416                 |
| <i>Nfix</i>    | 8.523388 | 7.49054  | 10.18001 | 8.829175 | 6.379807 | 6.788277 | 7.339321 | 3.597376 | 0.017148745                 |
| <i>Glis2</i>   | 23.42146 | 20.22029 | 36.06616 | 29.29902 | 18.2061  | 14.47908 | 20.82394 | 10.46062 | 0.01755182                  |
| <i>Grl2</i>    | 13.71164 | 7.388358 | 15.9763  | 11.19042 | 11.66951 | 1.548885 | 9.833759 | 6.625391 | 0.078952635                 |

**Table S3: GDNF pulse PC TF analysis**

Transcripts per million (TPM) are reported for each of the 12 principal cell specific transcription factors (Fig. 3) from GDNF pulsed (n=4 cultures) and control (n=4 cultures) tubuloids with p-values, determined by one-tailed Student's t-test.

**Table S4: Proliferation genes in *Pkd2*- tubuloids**

| GENE          | DOX1     | DOX2     | DOX3     | DOX4     | DMSO1    | DMSO2    | DMSO3    | DMSO4    | Two-tailed Student's t-test |
|---------------|----------|----------|----------|----------|----------|----------|----------|----------|-----------------------------|
| <i>Pcna</i>   | 132.0346 | 72.45922 | 146.0151 | 82.279   | 120.8519 | 121.7592 | 174.7354 | 143.3277 | 0.198243095                 |
| <i>Mki67</i>  | 1.84064  | 0.514181 | 6.985879 | 0.887624 | 2.314329 | 4.406596 | 7.160676 | 4.035646 | 0.328269372                 |
| <i>Birc5</i>  | 15.05231 | 14.21884 | 31.59758 | 7.910873 | 3.513497 | 32.02806 | 32.26265 | 22.77518 | 0.542083124                 |
| <i>Top2a</i>  | 17.04601 | 2.512155 | 50.96887 | 13.71334 | 34.49851 | 30.01402 | 34.47899 | 36.5376  | 0.269189562                 |
| <i>Fgf1</i>   | 28.08196 | 54.17641 | 30.51607 | 20.29025 | 24.06256 | 13.53972 | 29.65386 | 28.47016 | 0.296875262                 |
| <i>Ccnd1</i>  | 27.52501 | 34.37395 | 110.4346 | 115.9078 | 51.53557 | 34.25258 | 105.1313 | 68.45452 | 0.806612205                 |
| <i>Mcm2</i>   | 32.82517 | 5.989377 | 67.66323 | 43.3237  | 70.25122 | 34.48768 | 38.81866 | 41.99352 | 0.576219144                 |
| <i>Gmnn</i>   | 32.78538 | 51.02927 | 58.67824 | 20.23719 | 63.26325 | 63.86299 | 95.36338 | 50.55107 | 0.076769                    |
| <i>Map2k1</i> | 90.28978 | 103.3186 | 110.5618 | 143.1013 | 100.5623 | 153.0988 | 64.42082 | 134.8364 | 0.952167396                 |
| <i>Mapk1</i>  | 90.18806 | 79.34079 | 107.6615 | 99.08689 | 104.5303 | 76.477   | 75.97767 | 85.87185 | 0.389986305                 |
| <i>Braf</i>   | 5.33684  | 5.976084 | 7.261508 | 4.97417  | 11.38655 | 5.905678 | 9.284145 | 4.080653 | 0.341010592                 |

**Table S4: Proliferation genes in *Pkd2*- tubuloids**

Transcripts per million (TPM) are reported for each of the 11 proliferation genes from DOX treated (*Pkd2*-) (n=4 cultures) and DMSO treated (n=4 cultures) tubuloids with p-values, determined by two-tailed Student's t-test.

**Table S5: *Pkd2*- differentially expressed genes**

| GENE                        | Key   | Fold Change (log2) | P-value  | P-adj    |
|-----------------------------|-------|--------------------|----------|----------|
| <i>Tns1</i>                 | 21817 | -0.886637          | 1.54E-09 | 2.13E-05 |
| <i>Fhod3</i>                | 7436  | -2.2331063         | 6.24E-08 | 0.000246 |
| <i>Plscr2</i>               | 16979 | -0.551824          | 4.80E-08 | 0.000246 |
| <i>Rp2h</i>                 | 18538 | -0.7319563         | 7.13E-08 | 0.000246 |
| <i>Ttc7b</i>                | 22225 | 0.96903559         | 1.01E-07 | 0.000278 |
| <i>Lurap1l</i>              | 11828 | -0.8584363         | 2.04E-07 | 0.000469 |
| <i>Cyp11a1</i>              | 5398  | -3.95454           | 2.50E-07 | 0.000493 |
| <i>Uap111</i>               | 22345 | 1.07427609         | 5.74E-07 | 0.000991 |
| <i>Cnpy3</i>                | 4867  | 0.74646905         | 7.22E-07 | 0.001109 |
| <i>Renbp</i>                | 18194 | 0.9932179          | 1.81E-06 | 0.002502 |
| <i>Cdsn</i>                 | 4356  | 4.45575235         | 5.54E-06 | 0.006956 |
| <i>Grhl3</i>                | 9482  | 5.2921039          | 1.05E-05 | 0.012112 |
| <i>Zhx2</i>                 | 23940 | 0.70640915         | 1.35E-05 | 0.014314 |
| <i>Ankrd37</i>              | 2440  | -3.1662621         | 1.48E-05 | 0.014521 |
| <i>Hdhd2</i>                | 9818  | 0.34203803         | 1.58E-05 | 0.014521 |
| <i>B630005N14Rik (Bmt2)</i> | 3116  | -0.8049442         | 1.84E-05 | 0.015883 |
| <i>Heatr2</i>               | 9823  | 0.70116212         | 2.06E-05 | 0.016785 |
| <i>Alg6</i>                 | 2292  | -0.8873579         | 2.24E-05 | 0.017181 |
| <i>Eprs</i>                 | 6736  | 1.02868284         | 2.61E-05 | 0.018066 |
| <i>Slc3a2</i>               | 19719 | 0.83796655         | 2.49E-05 | 0.018066 |
| <i>Nfkbiz</i>               | 14381 | -1.2770209         | 2.76E-05 | 0.018139 |
| <i>Tph1</i>                 | 21873 | -5.1697975         | 3.05E-05 | 0.019149 |
| <i>Psen2</i>                | 17578 | 1.45523883         | 3.7E-05  | 0.02223  |
| <i>Lars</i>                 | 11396 | 0.94356128         | 5.13E-05 | 0.029549 |
| <i>Cox7a1</i>               | 5027  | -3.5191817         | 5.72E-05 | 0.030392 |
| <i>Slc1a3</i>               | 19515 | 2.13120498         | 5.66E-05 | 0.030392 |
| <i>Krt5</i>                 | 11219 | 9.00795606         | 7.85E-05 | 0.040196 |
| <i>Ccnd2</i>                | 4084  | 0.63569798         | 9.14E-05 | 0.042103 |
| <i>Cd38</i>                 | 4188  | 1.03533186         | 9.09E-05 | 0.042103 |
| <i>Mapkap1</i>              | 12046 | 0.53194512         | 9.02E-05 | 0.042103 |
| <i>Slc6a9</i>               | 19790 | 1.57457384         | 9.58E-05 | 0.042698 |
| <i>Adamts5</i>              | 2030  | -1.623841          | 0.00011  | 0.047624 |
| <i>Gaa</i>                  | 7711  | 0.88069113         | 0.000117 | 0.047624 |
| <i>Mfsd7c</i>               | 12332 | 1.89261777         | 0.000117 | 0.047624 |
| <i>Etv1</i>                 | 6850  | 0.83819896         | 0.000123 | 0.048598 |

**Table S5: *Pkd2*- differentially expressed genes**

A list of genes with reported fold change, p-value, and adjusted p-value ( $\leq 0.05$ ) resulting from differential expression (DESeq) analysis of DOX treated (*Pkd2*-) (n=4 cultures) and DMSO treated (n=4 cultures) tubuloids, represented in volcano plots and Heatmapper in Fig. 6.



**Table S6: Annotated *Pkd2* - differentially expressed genes**

Down- and upregulated differentially expressed genes in *Pkd2* - (DOX treated) tubuloids annotated with protein, function, and corresponding fold change. Functions were summarized described from National Library of Medicine (US), National Center for Biotechnology Information.

| GENE (DOWN)                            | Protein                                                          | Function [Human]                                                                                                                                                                                | Fold Change (log2) |
|----------------------------------------|------------------------------------------------------------------|-------------------------------------------------------------------------------------------------------------------------------------------------------------------------------------------------|--------------------|
| <i>Tph1</i>                            | Tryptophan hydroxylase 1                                         | encodes protein that catalyzes the rate-limiting step of serotonin biosynthesis                                                                                                                 | -5.1697975         |
| <i>Cyp11a1</i>                         | Cholesterol side-chain cleavage enzyme, mitochondrial            | encodes protein that localizes to the mitochondrial inner membrane and catalyzes the conversion of cholesterol to pregnenolone, the rate-limiting step in the synthesis of the steroid hormones | -3.95454           |
| <i>Cox7a1</i>                          | Cytochrome c oxidase subunit 7A1, mitochondrial                  | encodes component of heteromeric complex involved in electron transfer                                                                                                                          | -3.5191817         |
| <i>Ankrd37</i>                         | Ankyrin repeat domain 37                                         | undefined                                                                                                                                                                                       | -3.1662621         |
| <i>Fhod3</i>                           | FH1/FH2 domain-containing protein 3                              | encodes protein that is part of the diaphonous-related formins and has a predicted role in actin filament polymerization                                                                        | -2.2331063         |
| <i>Adamts5</i>                         | A disintegrin and metalloproteinase with thrombospondin motifs 5 | encodes a protein in the ADAMTS family that is involved in proteoglycan cleavage                                                                                                                | -1.623841          |
| <i>Nfkbiz</i>                          | NF-kappa-B inhibitor zeta                                        | encodes a member of the ankyrin-repeat family and is involved in inflammatory responses                                                                                                         | -1.2770209         |
| <i>Alg6</i>                            | Alpha-1,3-glucosyltransferase                                    | encodes a protein of the ALG6/8 glucosyltransferase family that catalyzes the addition of glucose residue for N-linked glycosylation                                                            | -0.8873579         |
| <i>Tns1</i>                            | Tensin-1                                                         | encodes a protein that localizes to the focal adhesions and crosslinks with the actin cytoskeleton; involved in signal transduction                                                             | -0.886637          |
| <i>Lurap11</i>                         | Leucine rich adaptor protein 1-like                              | undefined                                                                                                                                                                                       | -0.8584363         |
| <i>B630005N1</i><br><i>4Rik (Bmt2)</i> | base methyltransferase of 25S rRNA 2                             | undefined                                                                                                                                                                                       | -0.8049442         |
| <i>Rp2h</i>                            | retinitis pigmentosa 2 homolog or RP2 activator of ARL3 GTPase   | predicted gene product may be involved in beta-tubulin folding                                                                                                                                  | -0.7319563         |
| <i>Plscr2</i>                          | Phospholipid scramblase 2                                        | encodes a membrane protein that mediates plasma membrane exposure to phospholipids and phosphatidylserines                                                                                      | -0.551824          |

Down- and upregulated differentially expressed genes in *Pkd2*- (DOX treated) tubuloids annotated with protein, function, and corresponding fold change. Functions were summarized described from National Library of Medicine (US), National Center for Biotechnology Information.

| GENE (UP)     | Protein                                            | Function [Human]                                                                                                            | Fold Change (log2) |
|---------------|----------------------------------------------------|-----------------------------------------------------------------------------------------------------------------------------|--------------------|
| <i>Krt5</i>   | Keratin 5                                          | encodes a member of the keratin gene family coexpressed during differentiation of epithelial tissues                        | 9.00795606         |
| <i>Grhl3</i>  | Grainyhead-like transcription factor 3             | encodes for a protein that may act as a transcription factor during development to stimulate cell migration                 | 5.2921039          |
| <i>Cdsn</i>   | Corneodesmosin                                     | encodes a protein involved in comeocyte maturation and localizes to cornified epithelia and epidermis                       | 4.45575235         |
| <i>Slc1a3</i> | Solute carrier family 1 member 3                   | encodes a high affinity glutamate transporter                                                                               | 2.13120498         |
| <i>Mfsd7c</i> | FLVCR heme transporter 2                           | encodes a transmembrane calcium transporter that may be involved in development                                             | 1.89261777         |
| <i>Slc6a9</i> | solute carrier family 6 member 9                   | encodes a transporter involved in inhibition of glycine signaling                                                           | 1.57457384         |
| <i>Psen2</i>  | Presenilin-2                                       | encodes a component of multi-subunit gamma secretase complex that play roles in cellular processes and calcium homeostasis  | 1.45523883         |
| <i>Uap111</i> | UDP-N-acetylglucosamine pyrophosphorylase 1 like 1 | undefined                                                                                                                   | 1.07427609         |
| <i>Cd38</i>   | CD38 molecule                                      | encodes a transmembrane glycoprotein that synthesizes an intracellular calcium ion mobilizing messenger                     | 1.03533186         |
| <i>Eprs</i>   | glutamyl-prolyl-tRNA synthetase                    | encodes a multifunctional aminoacyl-tRNA synthetase that catalyzes aminoacylation of glutamic acid and proline tRNA species | 1.02868284         |
| <i>Renbp</i>  | Renin binding protein                              | encodes a product that inhibits renin and is a GlcNAc 2-epimerase                                                           | 0.9932179          |
| <i>Ttc7b</i>  | Tetratricopeptide repeat protein 7B                | undefined                                                                                                                   | 0.96903559         |
| <i>Lars</i>   | Leucyl-tRNA synthetase                             | encodes a cytosolic leucine-tRNA synthetase that catalyzes the ATP-dependent ligation of L-leucine to tRNA                  | 0.94356128         |
| <i>Gaa</i>    | Glucosidase alpha, acid                            | encodes lysosomal alpha-glucosidase                                                                                         | 0.88069113         |

Down- and upregulated differentially expressed genes in *Pkd2*- (DOX treated) tubuloids annotated with protein, function, and corresponding fold change. Functions were summarized described from National Library of Medicine (US), National Center for Biotechnology Information.

| GENE (UP)      | Protein                                                  | Function [Human]                                                                                                | Fold Change (log2) |
|----------------|----------------------------------------------------------|-----------------------------------------------------------------------------------------------------------------|--------------------|
| <i>Etv1</i>    | ETS variant transcription factor 1                       | encodes a protein that plays a role in cell growth, angiogenesis, migration, proliferation, and differentiation | 0.83819896         |
| <i>Slc3a2</i>  | Solute carrier family 3 member 2                         | encodes a transporter that regulates intracellular calcium levels and transports L-type amino acids             | 0.83796655         |
| <i>Cnpy3</i>   | Canopy FGF signaling regulator 3                         | encodes a protein that aids in toll-like receptor maturation and acts as a chaperone for protein export         | 0.74646905         |
| <i>Zhx2</i>    | Zinc fingers and homeoboxes 2                            | encodes for nuclear homodimeric transcriptional repressors that interact with the A subunit of nuclear factor-Y | 0.70640915         |
| <i>Heatr2</i>  | Dynein axonemal assembly factor 5                        | encodes a protein needed for axonemal dynein arms in organisms with motile cilia and flagella                   | 0.70116212         |
| <i>Ccnd2</i>   | Cyclin D2                                                | encodes a protein in the cyclin family and functions as a regulator of CDK kinases                              | 0.63569798         |
| <i>Mapkap1</i> | Mitogen-activated protein kinase associated protein 1    | encodes a protein similar to stress activated protein kinases                                                   | 0.53194512         |
| <i>Hdhd2</i>   | Haloacid dehalogenase-like hydrolase domain containing 2 | undefined                                                                                                       | 0.34203803         |
